# Supplementary material
Source: PubMed Central journal article supplement (PMC6455106)
Supplement: mjx059supplementarymaterial.pdf [file mjx059supplementarymaterial.pdf]

**Supplementary material for**  
**Simultaneous inference of phenotype-associated genes and relevant tissues**  
**from GWAS data via Bayesian integration of multiple tissue-specific gene**  
**networks**

Mengmeng Wu, Zhixiang Lin, Shining Ma, Ting Chen, Rui Jiang, Wing Hung Wong

## Supplementary Text

### Derivation of the equation (4)

According to the equation (2), the joint distribution of  $\mathbf{z}$  is specified as:

$$p(\mathbf{z} | \Phi, \mathbf{W}) = \frac{1}{T(\Phi)} \exp \left\{ \gamma \sum_{i=1}^N z_i + \sum_{k=1}^K \beta_k \sum_{1 \leq i < j \leq N} w_{ij}^{(k)} \mathbf{I}(z_i = z_j) \right\}$$

Then,

$$\begin{aligned} p(z_i = 1 | \mathbf{z}_{-i}, \Phi, \mathbf{W}) &= \frac{p(z_i = 1, \mathbf{z}_{-i}, \Phi, \mathbf{W})}{p(z_i = 1, \mathbf{z}_{-i}, \Phi, \mathbf{W}) + p(z_i = 0, \mathbf{z}_{-i}, \Phi, \mathbf{W})} \\ &= \frac{\frac{1}{T(\Phi)} \exp \left\{ \gamma + \sum_{k=1}^K \beta_k \sum_{j \neq i} w_{ij}^{(k)} \mathbf{I}(z_j = 1) + C \right\}}{\frac{1}{T(\Phi)} \exp \left\{ \gamma + \sum_{k=1}^K \beta_k \sum_{j \neq i} w_{ij}^{(k)} \mathbf{I}(z_j = 1) + C \right\} + \frac{1}{T(\Phi)} \exp \left\{ \sum_{k=1}^K \beta_k \sum_{j \neq i} w_{ij}^{(k)} \mathbf{I}(z_j = 0) + C \right\}} \\ &= \frac{\exp \left\{ \gamma + \sum_{k=1}^K \beta_k \sum_{j \neq i} w_{ij}^{(k)} \mathbf{I}(z_j = 1) \right\}}{\exp \left\{ \gamma + \sum_{k=1}^K \beta_k \sum_{j \neq i} w_{ij}^{(k)} \mathbf{I}(z_j = 1) \right\} + \exp \left\{ \sum_{k=1}^K \beta_k \sum_{j \neq i} w_{ij}^{(k)} \mathbf{I}(z_j = 0) \right\}} \\ &= \frac{1}{1 + \exp \left\{ - \left( \gamma + \sum_{k=1}^K \beta_k \sum_{j \neq i} w_{ij}^{(k)} (\mathbf{I}(z_j = 1) - \mathbf{I}(z_j = 0)) \right) \right\}} \\ &= \frac{1}{1 + \exp \left\{ - \left( \gamma + \sum_{k=1}^K \beta_k \sum_{j \neq i} w_{ij}^{(k)} (2z_j - 1) \right) \right\}} \\ &= \frac{1}{1 + \exp \left\{ - \left( \gamma + \sum_{k=1}^K \beta_k x_{ik} \right) \right\}} \end{aligned}$$

where  $C$  is an expression that is irrelevant to  $z_i$ , and  $x_{ik} = \sum_{j \neq i} w_{ij}^{(k)} (2z_j - 1)$ . Then, we can easily obtain the equation (4).

## Parameter initialization via a simple model

We resorted to a simple two-component mixture model of p-values for the initialization of  $\alpha_0$  and  $\alpha_1$ , in which association status of genes were assumed to be independent. With a similar approach as described above, we introduced a hidden indicator  $z_i$  to gene  $i$ , indicating the association status of the gene and the phenotype of interest, and we use the same equation (1) to describe the conditional distributions of p-values given the hidden indicators. The distribution for the hidden indicators is specified without the MRF prior, as:

$$p(\mathbf{z}) = \prod_{i=1}^N p(z_i)$$
$$p(z_i = 1) = \pi_0$$

Parameters of this simple model include  $\Phi_0 = \{\alpha_0, \alpha_1, \pi_0\}$  and can be estimated using the expectation maximization (EM) algorithm implemented as iterative alternation between the E-step and the M-step, as

E-step:

$$q_i = p(z_i = 1 | p_i, \Phi_0) = \frac{\pi_0 \alpha_1 p_i^{\alpha_1 - 1}}{\pi_0 \alpha_1 p_i^{\alpha_1 - 1} + (1 - \pi_0) \alpha_0 p_i^{\alpha_0 - 1}}$$

M-step:

$$\pi = \frac{1}{N} \sum_{i=1}^N q_i, \alpha_1 = -\frac{\sum_{i=1}^N q_i}{\sum_{i=1}^N q_i \log p_i}, \alpha_0 = -\frac{\sum_{i=1}^N (1 - q_i)}{\sum_{i=1}^N (1 - q_i) \log p_i}$$

Empirically, the EM procedure converged rapidly, and we initialized parameters with  $\alpha_0 = 1, \alpha_1 = 0.2, \pi_0 = 0.1$ , which were found to work well in practice. The estimated parameters  $\alpha_0$  and  $\alpha_1$  were then served as the starting point for the MCMC sampling and were observed to speed up convergence as expected. The hidden indicator  $\mathbf{z}$  was initialized by

$z_i \sim \text{Bernoulli}(q_i)$ . The initialization procedures for other parameters are specified as: 1) parameters  $\gamma$  and  $\beta$  are initialized as zeros; 2) parameters  $\gamma$  and  $\mathbf{I}$  are sampled given the other parameters according to equations (9) and (10)

### **Simulation studies for different genetic characteristics**

Our model assumes that genetic characteristics of a phenotype could be described by three parameters  $\alpha_0, \alpha_1$  and  $\gamma$ , among which the latest two determine statistical properties that a gene is associated with a phenotype and are of particular interest. Specifically,  $\alpha_1$  controls the shape of the distribution of  $p$ -values for genes associated with a phenotype, and  $\gamma$  controls the probability that a gene is associated with a phenotype without considering the contribution of gene networks. To study the performance of our model in different combinations of these genetic characteristics, we conducted similar simulation studies as the previous section, except that we varied  $\alpha_1$  and  $\gamma$ , where  $\alpha_1 \in \{0.05, 0.1, 0.2\}$  and  $\gamma \in \{-3, -2, -1\}$ . First, we found that our method could correctly estimate these parameters (Supplementary Figure 2). We then compared the performance of our method under different settings and presented the result in Supplementary Figure 3. As expected, parameter  $\gamma$  determines the number of associated genes, with larger  $\gamma$  resulting in more associated genes, as shown in Supplementary Figure 3 (A). We then calculated the average improvement of performance in identifying associated genes under different settings, with the use of the  $p$ -value approach served as a baseline. As shown in Supplementary Figure 3 (B), the improvement is more pronounced when  $\alpha_1 = 0.2$  than  $\alpha_1 = 0.1$  and  $\alpha_1 = 0.05$ , implying more space for improvement when the association strength is weaker (i.e., larger value of  $\alpha_1$ ). This is reasonable because the statistical power is already

high for small values of  $\alpha_1$ . At a fixed value of  $\alpha_1$ , the improvement of performance increases with the increase of  $\gamma$ , because more genes are associated with the phenotype for larger  $\gamma$ , and hence the identification of associated genes become easier. As for the identification of relevant tissues, the power of our method increases with the increase of  $\gamma$  at a fixed  $\alpha_1$ , as shown in Supplementary Figure 3 (C). This is also reasonable because larger  $\gamma$  means more associated genes, which makes it easier to estimate the effect sizes of different gene networks and identify corresponding relevant tissues. In summary, all the above evidence supports the effectiveness of our method under different genetic characteristics.

### **GO analysis of complex diseases**

Using the same procedure as the one used in the main text, we performed GO enrichment analysis for Rheumatoid Arthritis, Crohn's Disease, Osteoporosis and Multiple Sclerosis and drew the corresponding figures, including Supplementary Figure 11-14. As shown in these figures, the prioritized genes given by SIGNET show stronger enrichment in some GOs while less enrichment in other GOs compared with GWAS only. In detail, we found that the GOs enhanced by SIGNET had more clear phenotype-associated biological meanings. For example, we observed that many immune-related GOs showed more significant enrichment for Rheumatoid Arthritis, Crohn's Disease and Multiple Sclerosis, and all of the three diseases were immune-related. For Osteoporosis, we found that skeletal system development were lifted by SIGNET, and it made sense because Osteoporosis was bone-related diseases. Therefore, SIGNET showed ability to improve discovery of phenotype-associated GOs.

## Supplementary Figures

**Supplementary Figure S1. The relationship between estimated values of  $\gamma$  and the number of associated SNPs.** Each point represents a complex trait, x axis denotes the estimated value of gamma from the SIGNET, and y axis denotes the number of associated SNPs (from the GWAS catalog database). The blue line denotes the fitted line for linear regression and the shaded regions represents standard deviation.

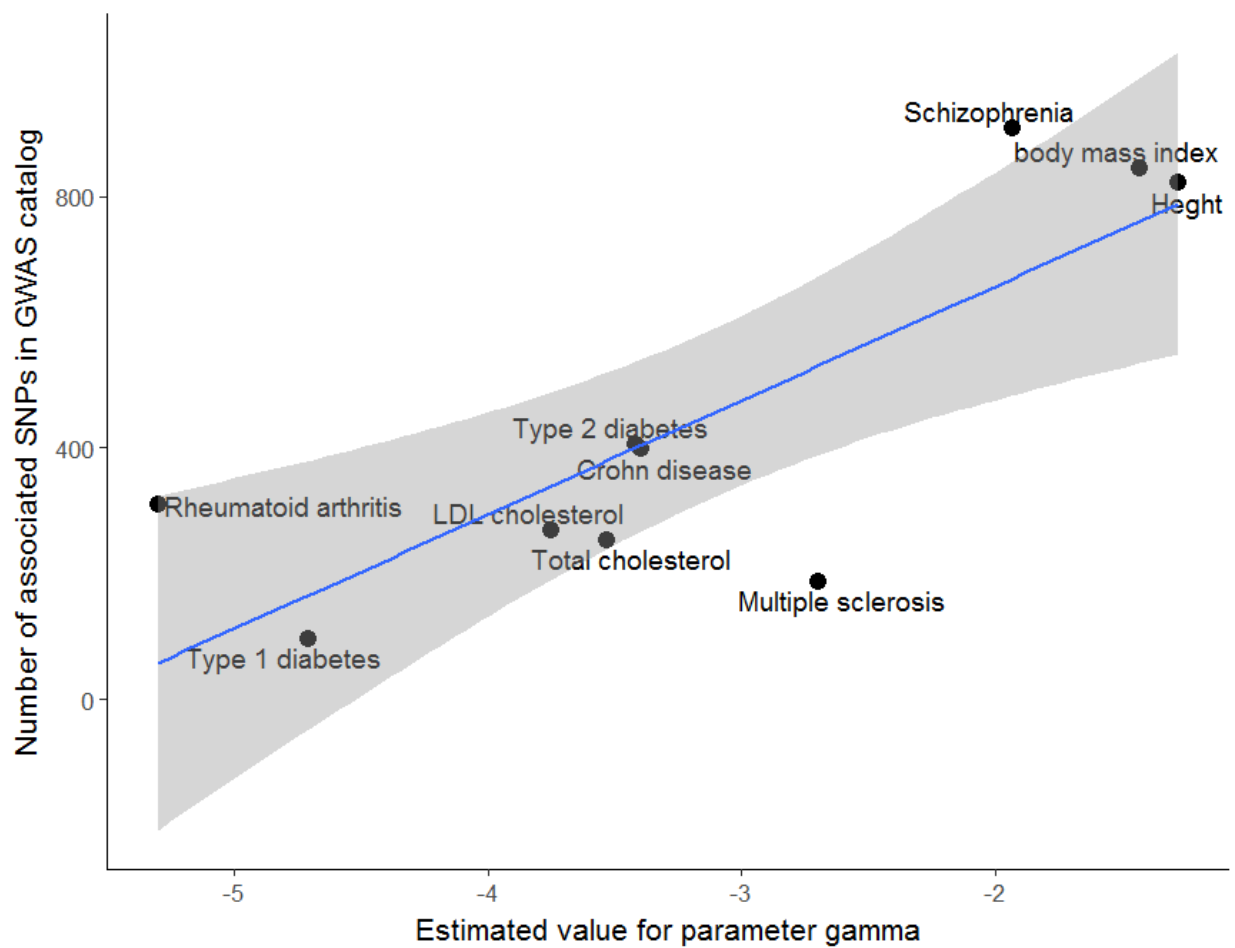

**Supplementary Figure S2. Parameters estimation for different genetic characteristics in simulation studies.** (A) Estimated values of  $\alpha_0$ , with real value being 0.8. (B) Estimated values of  $\alpha_1$ , with real values being 0.05, 0.1, and 0.2, respectively. (C) Estimated values of  $\gamma$ , with real values being -3, -2 and -1, respectively.

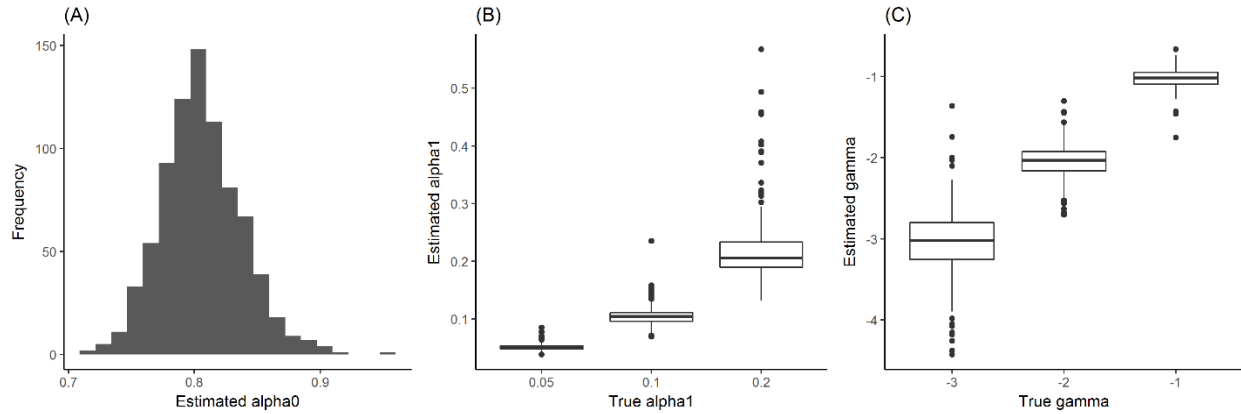

**Supplementary Figure S3. Results for simulation studies with different genetic characteristics.** (A) Numbers of associated genes under different simulation settings; (B) average improvement of SIGNET in AUC for gene prioritization compared with  $p$ -value under different simulation settings; (C) AUCs of SIGNET for tissue identification under different simulation settings.

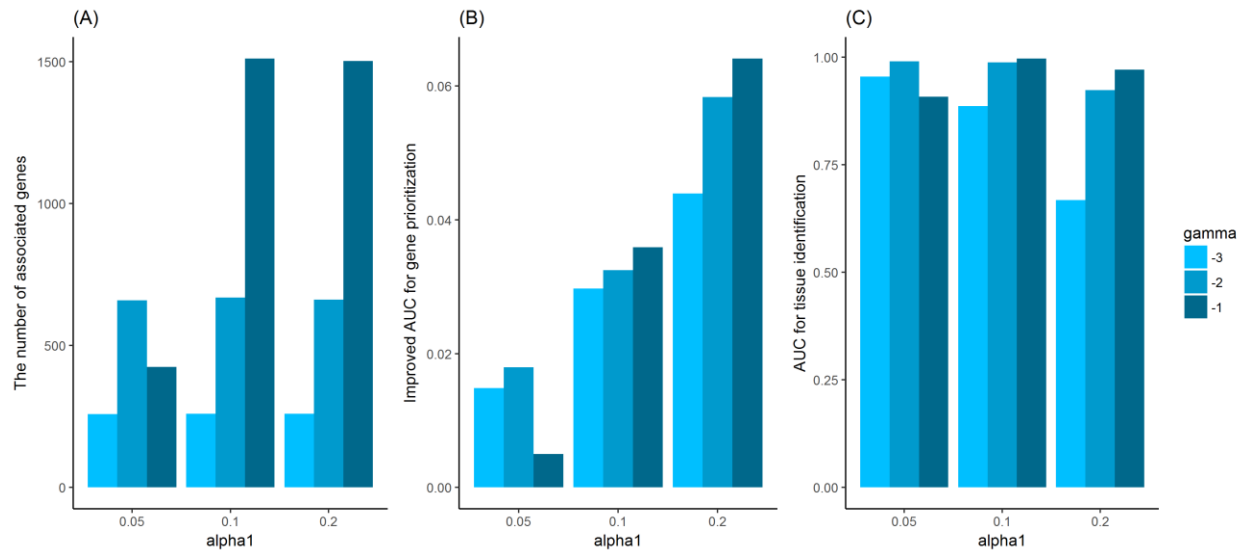



**Supplementary Figure S4. QQ plots of the gene-level  $p$ -values of the 14 complex traits analyzed in the main txt.** In each subplot, x axis and y axis represents quantiles of  $-\log_{10}(p\text{-value})$  under uniform distribution and observed empirical distribution. The red line denotes  $y = x$  and the back line denotes the quantile-quantile (QQ) plot.

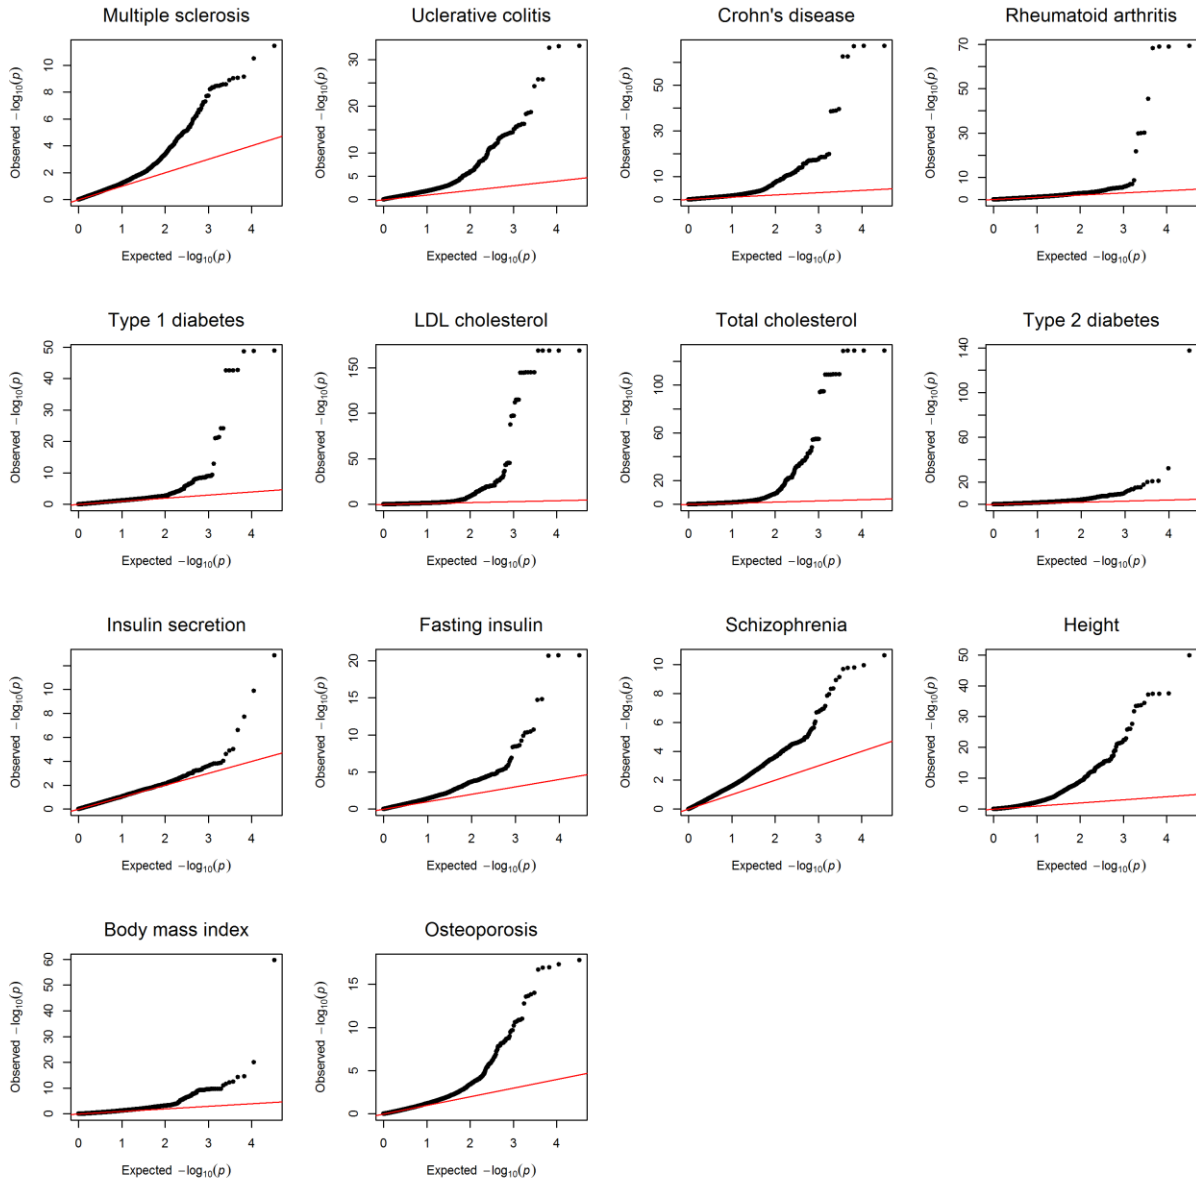

**Supplementary Figure S5. Distributions of edge weights across the 32 tissue-specific gene networks.** In each subplot, x axis denotes  $\log_{10}(\text{weight})$  and y axis denotes corresponding frequency.

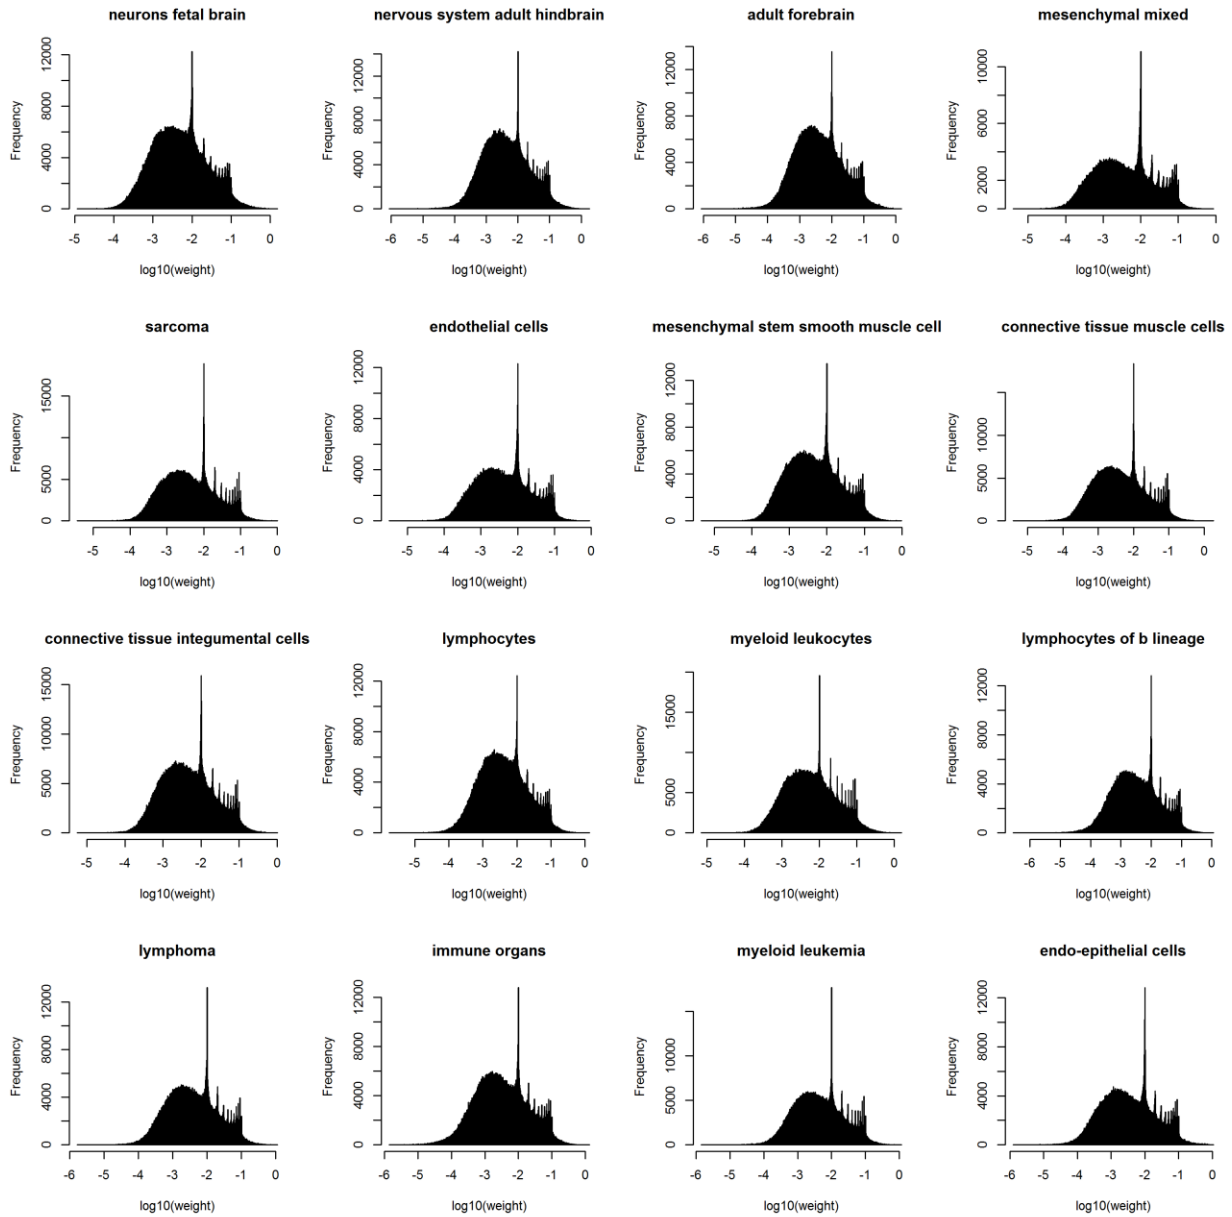

## Supplementary Figure S5. Continued.

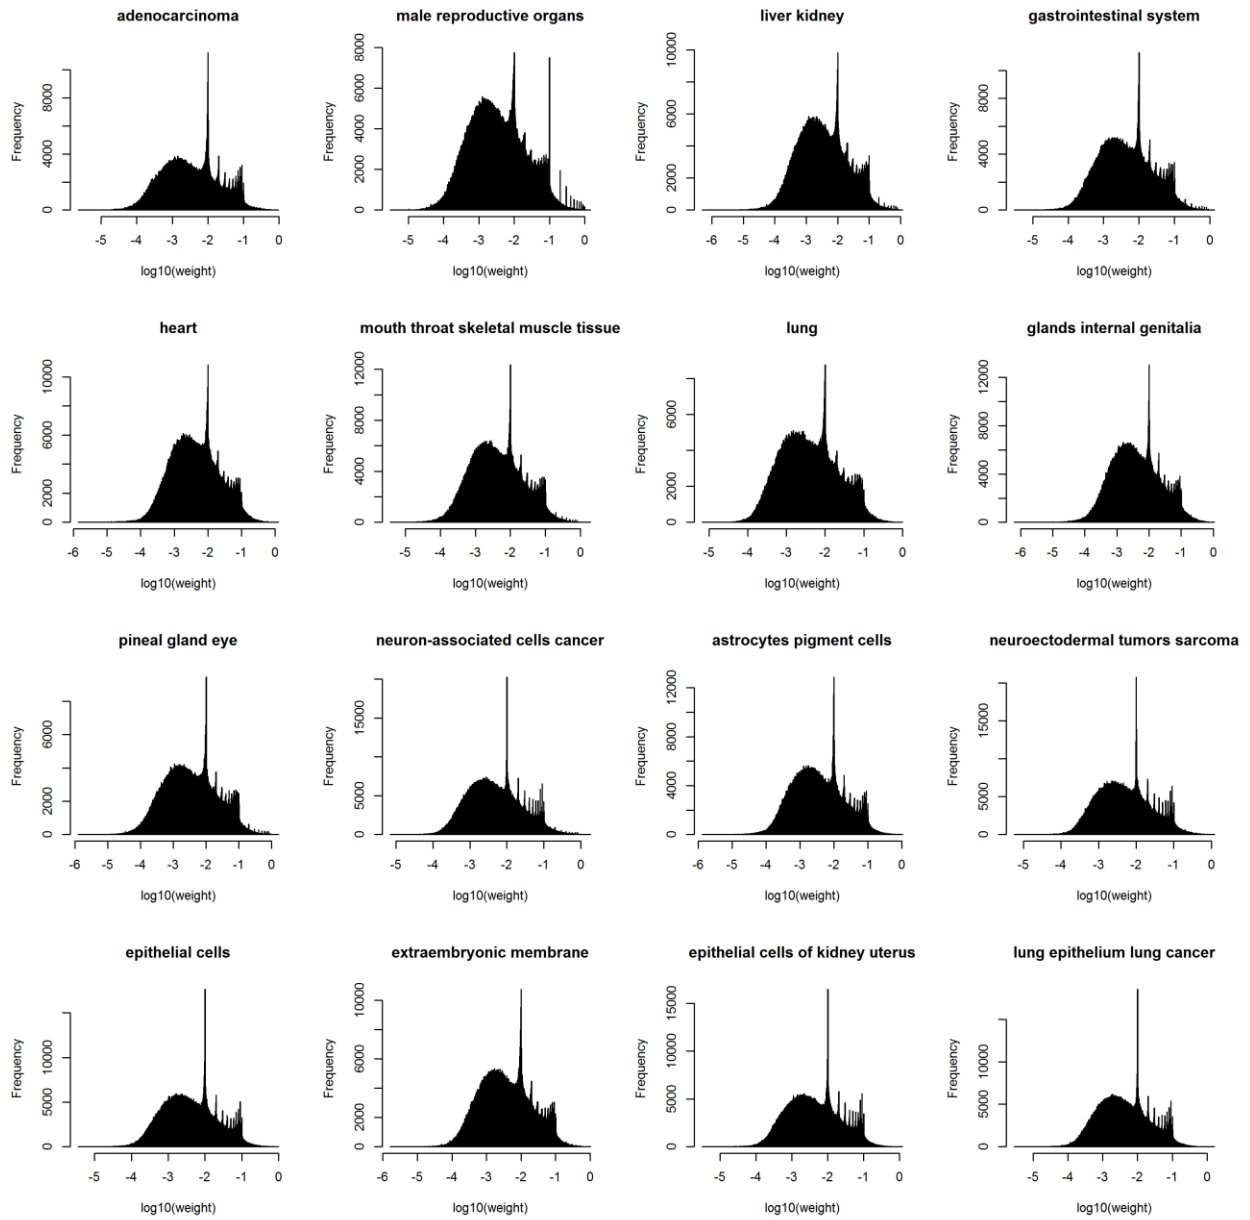

**Supplementary Figure S6. Cluster analysis of the 14 complex traits by their PIPs across the 32 tissues on the 32 filtered tissue-specific gene regulatory networks (threshold: 0.0001).**

Each column denotes a tissue, and each row represents the vector of PIPs across the 32 tissues for a complex trait. The from-white-to-red color represents the value of PIP from low to high. Cluster assignments for phenotypes are based on the result of cluster analysis on original networks (Figure 4 in the main text).

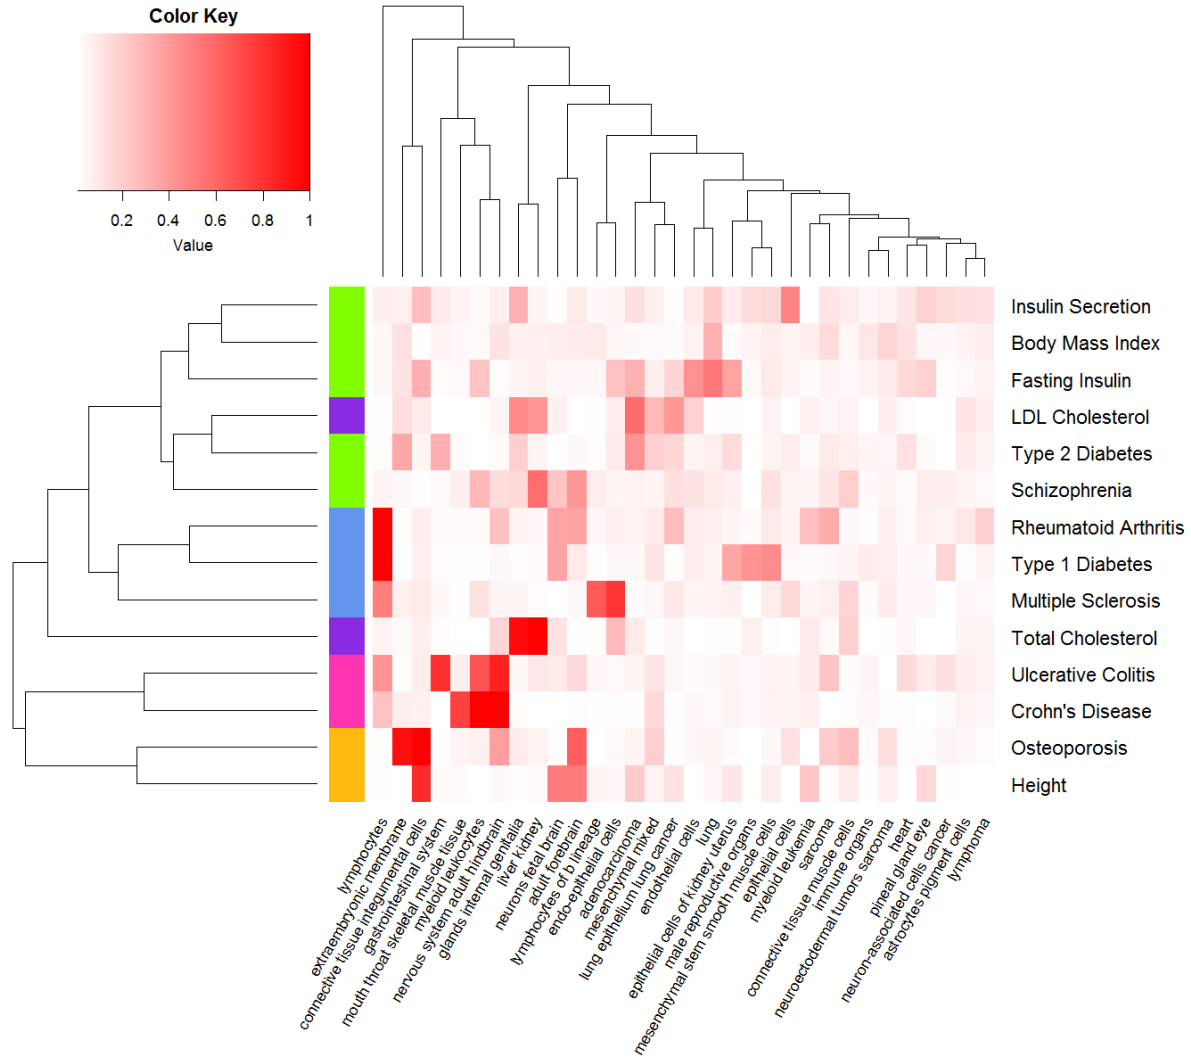

**Supplementary Figure S7. Cluster analysis of the 14 complex traits by their PIPs across the 32 tissues on the 32 filtered tissue-specific gene regulatory networks (threshold: 0.001).**

Each column denotes a tissue, and each row represents the vector of PIPs across the 32 tissues for a complex trait. The from-white-to-red color represents the value of PIP from low to high. Cluster assignments for phenotypes are based on the result of cluster analysis on original networks (Figure 4 in the main text).

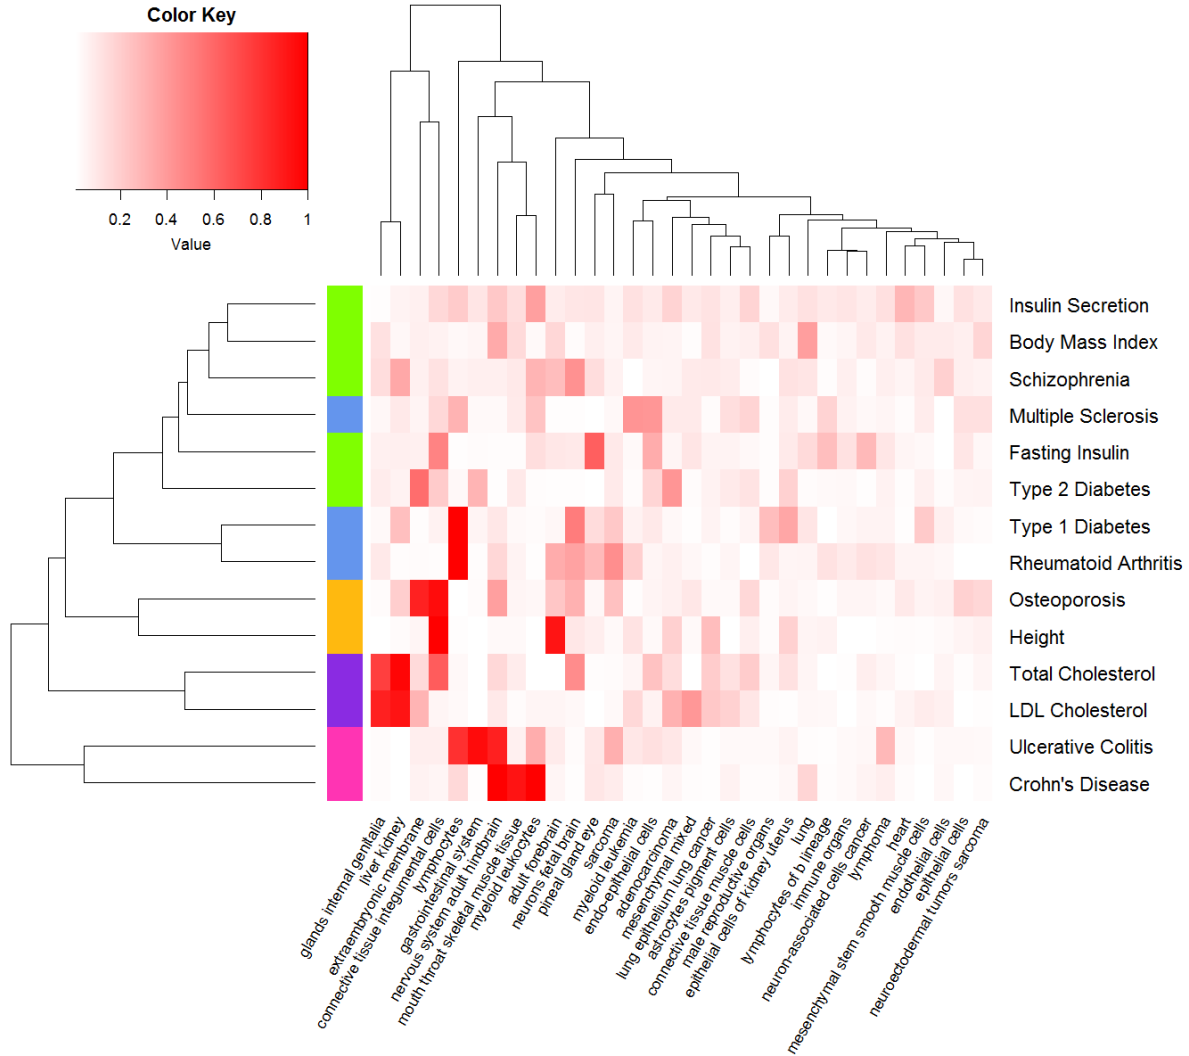

**Supplementary Figure S8. Cluster analysis of the 14 complex traits by their PIPs across the 32 tissues on the 32 filtered tissue-specific gene regulatory networks (threshold: 0.01).** Each column denotes a tissue, and each row represents the vector of PIPs across the 32 tissues for a complex trait. The from-white-to-red color represents the value of PIP from low to high. Cluster assignments for phenotypes are based on the result of cluster analysis on original networks (Figure 4 in the main text).

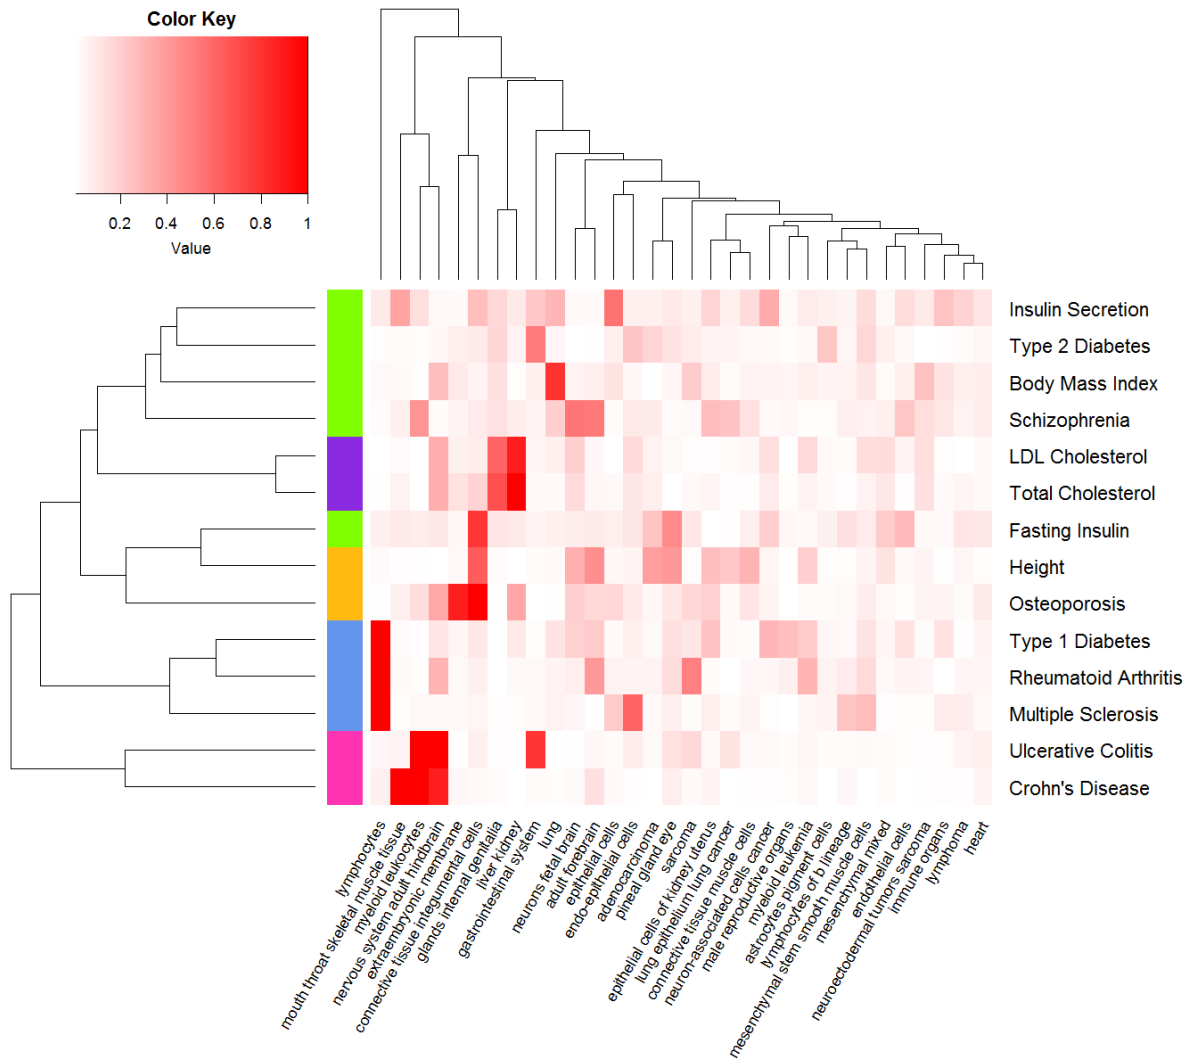

**Supplementary Figure S9. Cluster analysis of the 14 complex traits by their PIPs across the 32 tissues on the 32 filtered tissue-specific gene regulatory networks (threshold: 0.1).** Each column denotes a tissue, and each row represents the vector of PIPs across the 32 tissues for a complex trait. The from-white-to-red color represents the value of PIP from low to high. Cluster assignments for phenotypes are based on the result of cluster analysis on original networks (Figure 4 in the main text).

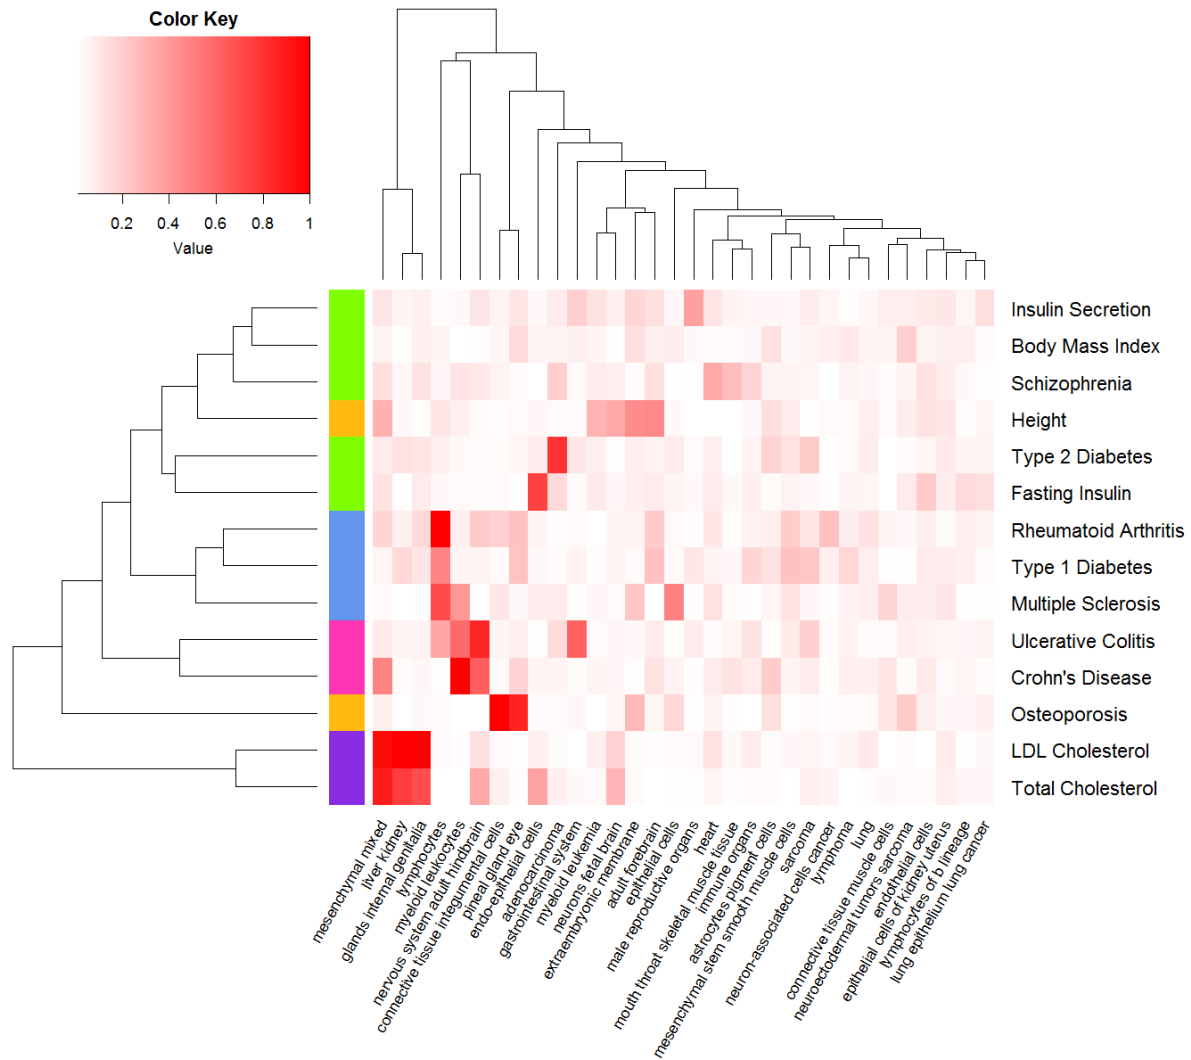

### Supplementary Figure S10. The influence of network edge filtering on gene prioritization.

For each one of the six complex diseases, including rheumatoid arthritis; Crohn's disease; schizophrenia; osteoporosis; multiple sclerosis and ulcerative colitis, we extracted corresponding disease genes with evidence scores from DisGeNET. The AUCs of SIGNET on different networks filtered by different thresholds are computed under different thresholds for the evidence score. In each subplot, the x axis denotes the threshold of the evidence score, and the y axis indicates AUC.

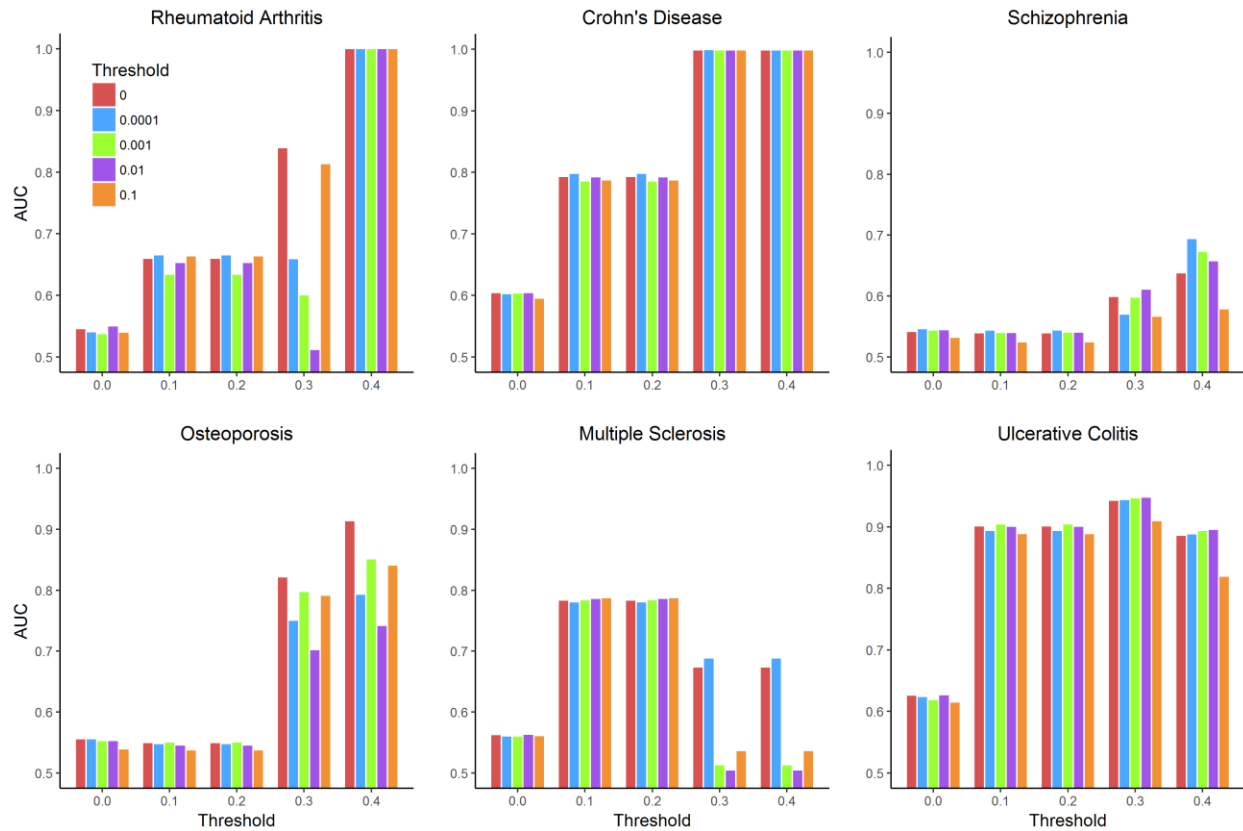



**Supplementary Figure S11.** GO analysis for Rheumatoid Arthritis. Using the top 23 genes (global FDR  $\leq 0.05$ ) ranked by  $p$ -value (or GWAS only) and SIGNET, we conducted gene ontology (GO) enrichment analysis and compared the significance of each GO term given by the two methods. Each point represents a GO term, and x axis and y axis denotes the  $-\log_{10}(\text{p-value})$  obtained by  $p$ -value and SIGNET.

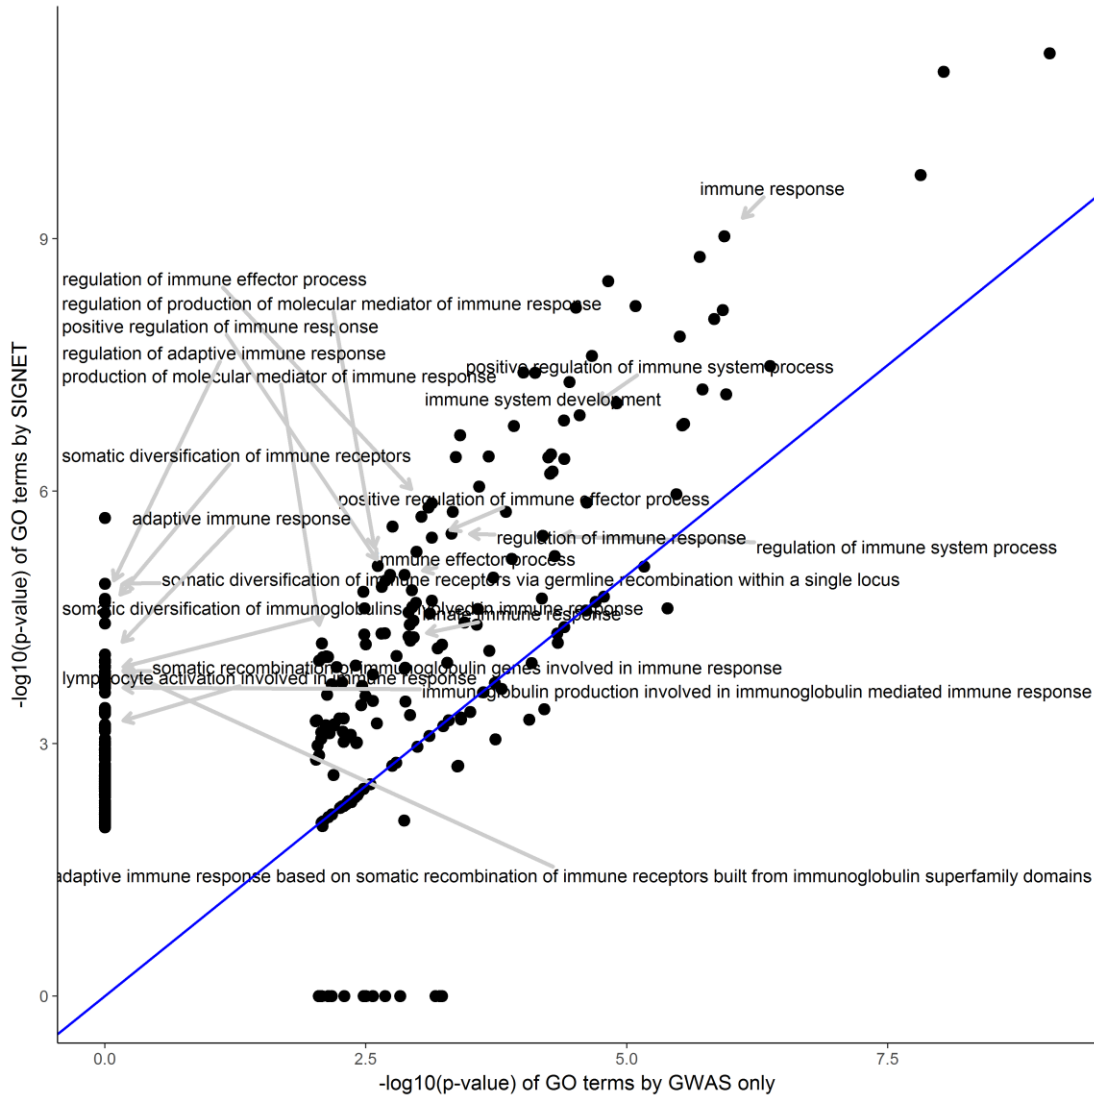

**Supplementary Figure S12.** GO analysis for Crohn's Disease. Using the top 204 genes (global  $FDR \leq 0.05$ ) ranked by  $p$ -value (or GWAS only) and SIGNET, we conducted gene ontology (GO) enrichment analysis and compared the significance of each GO term given by the two methods. Each point represents a GO term, and x axis and y axis denotes the  $-\log_{10}(p\text{-value})$  obtained by  $p$ -value and SIGNET.

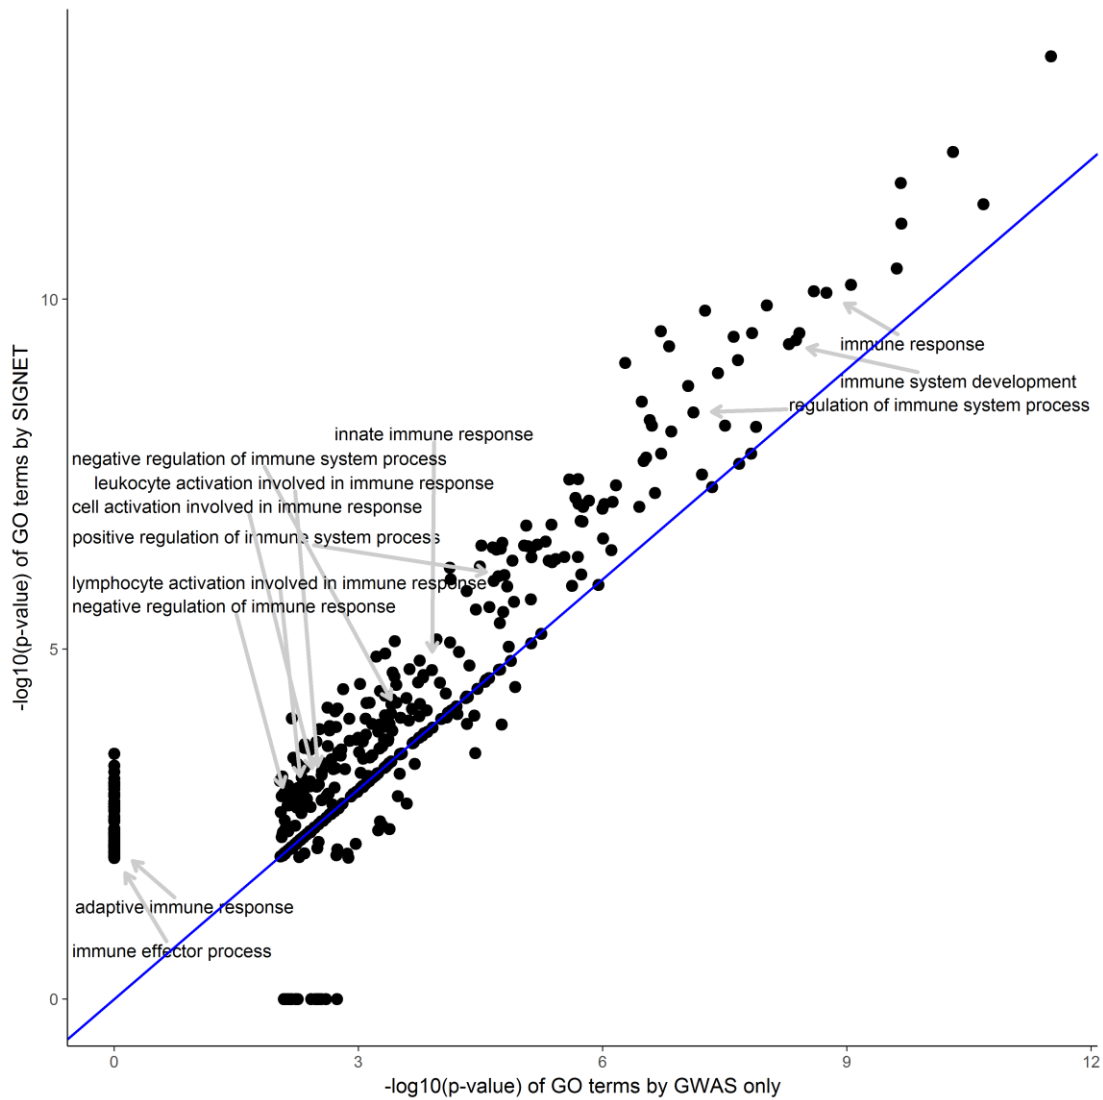

**Supplementary Figure S13.** GO analysis for Osteoporosis. Using the top 115 genes (global  $FDR \leq 0.05$ ) ranked by  $p$ -value (or GWAS only) and SIGNET, we conducted gene ontology (GO) enrichment analysis and compared the significance of each GO term given by the two methods. Each point represents a GO term, and x axis and y axis denotes the  $-\log_{10}(p\text{-value})$  obtained by  $p$ -value and SIGNET.

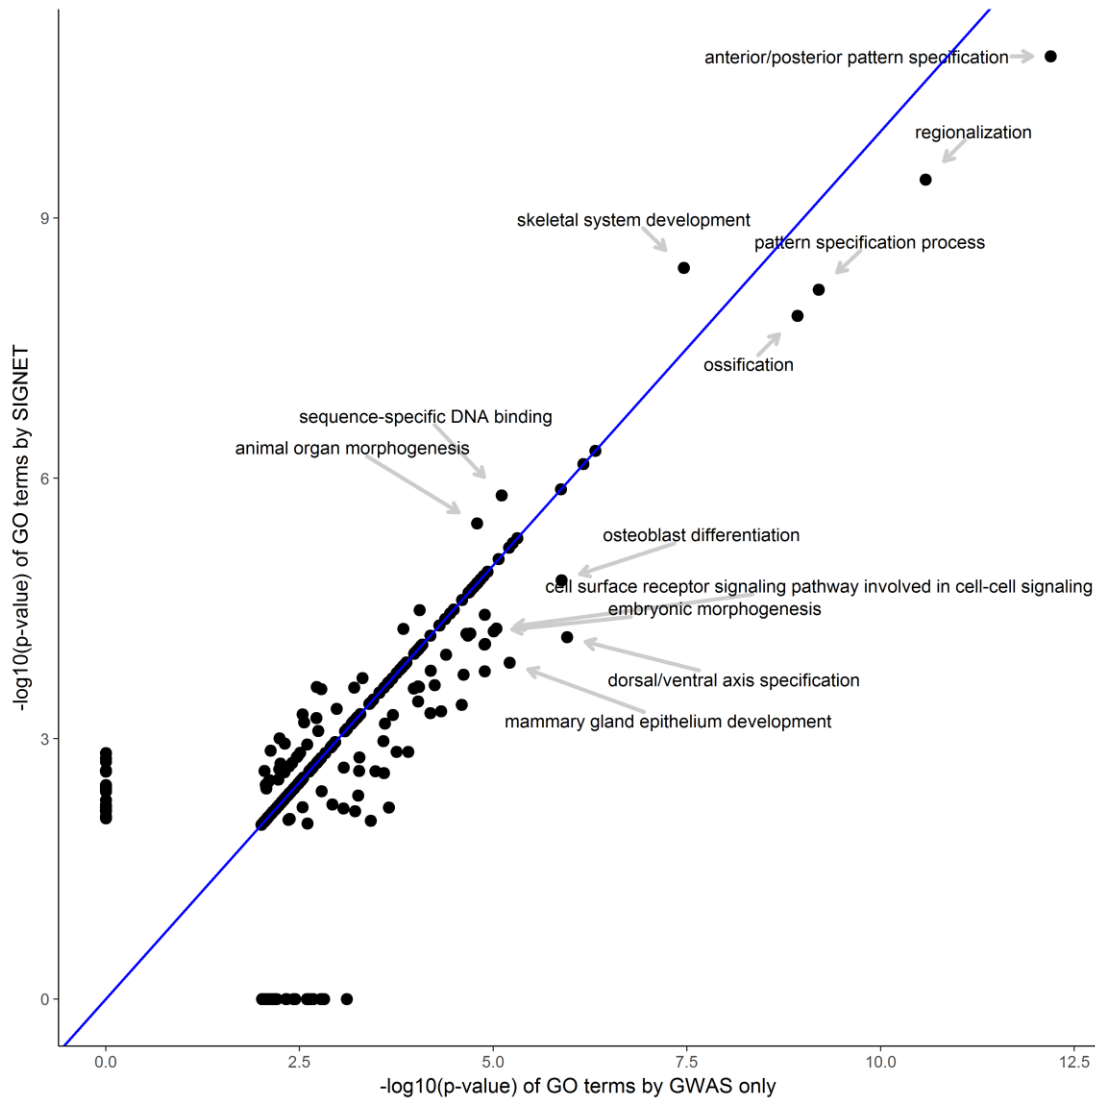

**Supplementary Figure S14.** GO analysis for Multiple Sclerosis. Using the top 115 genes (global FDR  $\leq 0.05$ ) ranked by  $p$ -value (or GWAS only) and SIGNET, we conducted gene ontology (GO) enrichment analysis and compared the significance of each GO term given by the two methods. Each point represents a GO term, and x axis and y axis denotes the  $-\log_{10}(\text{p-value})$  obtained by  $p$ -value and SIGNET.

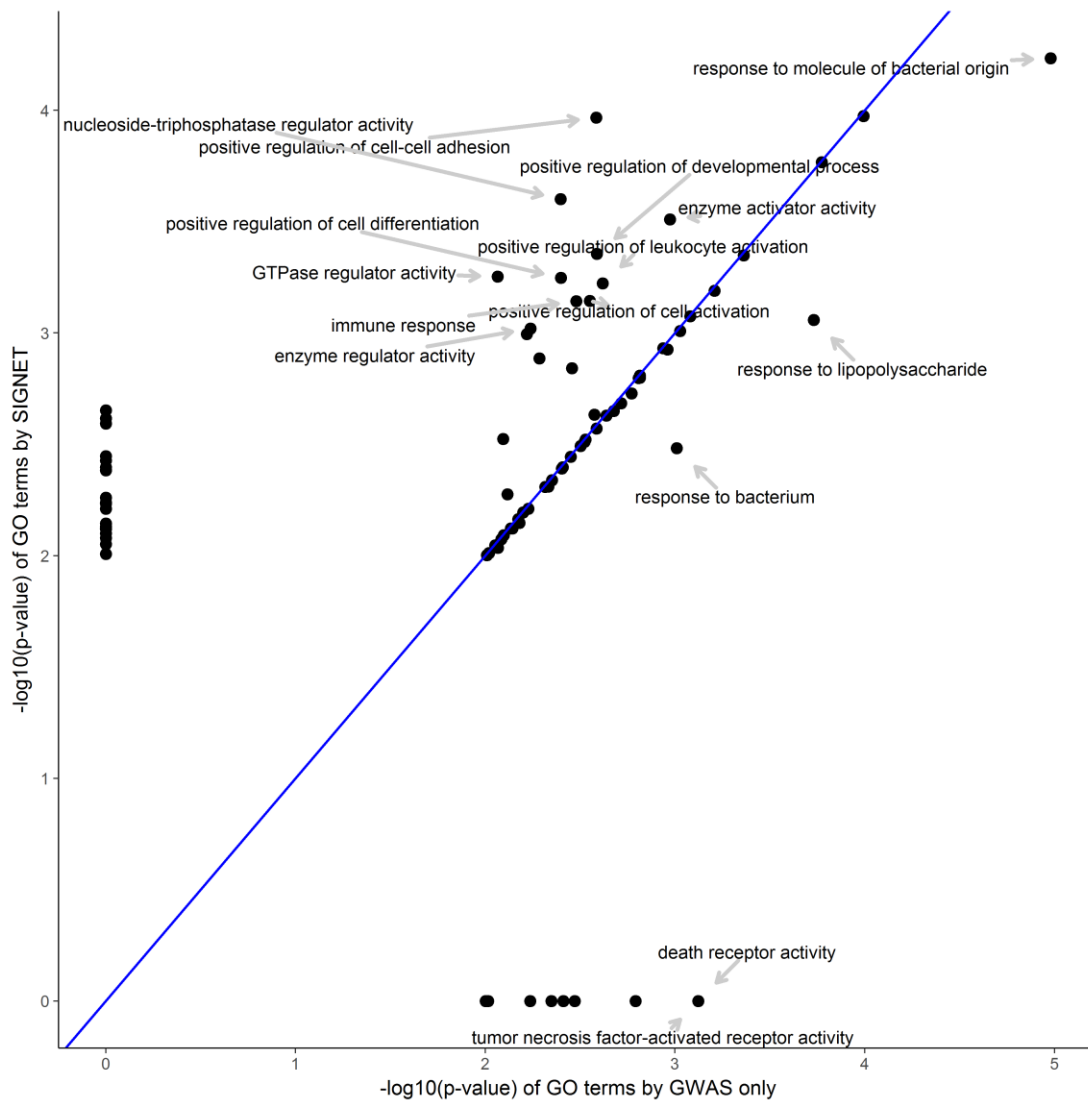

## Supplementary Tables

**Supplementary Table S1. Performance comparison between different algorithms on Rheumatoid Arthritis.** K denotes the number of top ranked genes. Each entry denotes the number of associated genes (retrieved from the DisGeNet database) in the top k genes given by each algorithm. The largest numbers for each k are bolded.

| <b>k</b>     | <b>p-value</b> | <b>SIGNET<br/>(single)</b> | <b>NetWAS</b> | <b>SIGNET</b> |
|--------------|----------------|----------------------------|---------------|---------------|
| <b>100</b>   | 37             | 37                         | 15            | <b>44</b>     |
| <b>200</b>   | 54             | 53                         | 32            | <b>63</b>     |
| <b>300</b>   | 67             | 70                         | 52            | <b>87</b>     |
| <b>400</b>   | 93             | 92                         | 65            | <b>109</b>    |
| <b>500</b>   | 109            | 111                        | 86            | <b>128</b>    |
| <b>600</b>   | 123            | 121                        | 98            | <b>141</b>    |
| <b>700</b>   | 136            | 131                        | 107           | <b>158</b>    |
| <b>800</b>   | 145            | 139                        | 117           | <b>169</b>    |
| <b>900</b>   | 153            | 151                        | 127           | <b>178</b>    |
| <b>1,000</b> | 171            | 165                        | 134           | <b>192</b>    |

**Supplementary Table S2. Performance comparison between different algorithms on Crohn Disease.** K denotes the number of top ranked genes. Each entry denotes the number of associated genes (retrieved from the DisGeNet database) in the top k genes given by each algorithm. The largest numbers for each k are bolded.

| <b>k</b>     | <b>p-value</b> | <b>SIGNET<br/>(single)</b> | <b>NetWAS</b> | <b>SIGNET</b> |
|--------------|----------------|----------------------------|---------------|---------------|
| <b>100</b>   | 49             | 50                         | 14            | <b>50</b>     |
| <b>200</b>   | 75             | 75                         | 24            | <b>77</b>     |
| <b>300</b>   | 84             | 84                         | 27            | <b>90</b>     |
| <b>400</b>   | 89             | 89                         | 35            | <b>100</b>    |
| <b>500</b>   | 97             | 99                         | 37            | <b>107</b>    |
| <b>600</b>   | 106            | 107                        | 51            | <b>118</b>    |
| <b>700</b>   | 111            | 112                        | 60            | <b>121</b>    |
| <b>800</b>   | 114            | 117                        | 69            | <b>130</b>    |
| <b>900</b>   | 120            | 122                        | 79            | <b>139</b>    |
| <b>1,000</b> | 127            | 129                        | 83            | <b>141</b>    |

**Supplementary Table S3. Performance comparison between different algorithms on Schizophrenia.** K denotes the number of top ranked genes. Each entry denotes the number of associated genes (retrieved from the DisGeNet database) in the top k genes given by each algorithm. The largest numbers for each k are bolded.

| <b>k</b>     | <b>p-value</b> | <b>SIGNET<br/>(single)</b> | <b>NetWAS</b> | <b>SIGNET</b> |
|--------------|----------------|----------------------------|---------------|---------------|
| <b>100</b>   | 25             | 25                         | 12            | <b>27</b>     |
| <b>200</b>   | 41             | 42                         | 21            | <b>41</b>     |
| <b>300</b>   | 52             | 54                         | 32            | <b>54</b>     |
| <b>400</b>   | 65             | 68                         | 42            | <b>70</b>     |
| <b>500</b>   | 78             | 83                         | 53            | <b>83</b>     |
| <b>600</b>   | 87             | 90                         | 68            | <b>93</b>     |
| <b>700</b>   | 102            | 101                        | 73            | <b>108</b>    |
| <b>800</b>   | 114            | 117                        | 86            | <b>121</b>    |
| <b>900</b>   | 126            | 129                        | 102           | <b>134</b>    |
| <b>1,000</b> | 135            | 140                        | 116           | <b>141</b>    |

**Supplementary Table S4. Performance comparison between different algorithms on Osteoporosis.** K denotes the number of top ranked genes. Each entry denotes the number of associated genes (retrieved from the DisGeNet database) in the top k genes given by each algorithm. The largest numbers for each k are bolded.

| <b>k</b>     | <b>p-value</b> | <b>SIGNET<br/>(single)</b> | <b>NetWAS</b> | <b>SIGNET</b> |
|--------------|----------------|----------------------------|---------------|---------------|
| <b>100</b>   | <b>18</b>      | <b>18</b>                  | 8             | 17            |
| <b>200</b>   | 21             | <b>22</b>                  | 9             | <b>22</b>     |
| <b>300</b>   | 26             | 26                         | 12            | <b>27</b>     |
| <b>400</b>   | <b>30</b>      | <b>30</b>                  | 15            | <b>30</b>     |
| <b>500</b>   | 32             | 32                         | 18            | <b>36</b>     |
| <b>600</b>   | 37             | 37                         | 22            | <b>39</b>     |
| <b>700</b>   | <b>41</b>      | 40                         | 27            | <b>41</b>     |
| <b>800</b>   | 42             | 42                         | 32            | <b>43</b>     |
| <b>900</b>   | 47             | <b>48</b>                  | 36            | <b>48</b>     |
| <b>1,000</b> | 50             | 50                         | 38            | <b>52</b>     |



**Supplementary Table S5. Performance comparison between different algorithms on Multiple Sclerosis.** K denotes the number of top ranked genes. Each entry denotes the number of associated genes (retrieved from the DisGeNet database) in the top k genes given by each algorithm. The largest numbers for each k are bolded.

| <b>k</b>     | <b>p-value</b> | <b>SIGNET<br/>(single)</b> | <b>NetWAS</b> | <b>SIGNET</b> |
|--------------|----------------|----------------------------|---------------|---------------|
| <b>100</b>   | 14             | 14                         | 13            | <b>16</b>     |
| <b>200</b>   | 25             | 25                         | 30            | <b>31</b>     |
| <b>300</b>   | 37             | 37                         | 37            | <b>39</b>     |
| <b>400</b>   | <b>47</b>      | <b>47</b>                  | 46            | <b>47</b>     |
| <b>500</b>   | 55             | 55                         | 55            | <b>62</b>     |
| <b>600</b>   | 60             | 60                         | 66            | <b>68</b>     |
| <b>700</b>   | 65             | 65                         | <b>80</b>     | 72            |
| <b>800</b>   | 69             | 69                         | <b>84</b>     | 77            |
| <b>900</b>   | 76             | 74                         | <b>95</b>     | 89            |
| <b>1,000</b> | 82             | 81                         | <b>103</b>    | 96            |

**Supplementary Table S6. Performance comparison between different algorithms on Ulcerative Colitis.** K denotes the number of top ranked genes. Each entry denotes the number of associated genes (retrieved from the DisGeNet database) in the top k genes given by each algorithm. The largest numbers for each k are bolded.

| <b>k</b>     | <b>p-value</b> | <b>SIGNET<br/>(single)</b> | <b>NetWAS</b> | <b>SIGNET</b> |
|--------------|----------------|----------------------------|---------------|---------------|
| <b>100</b>   | <b>20</b>      | <b>20</b>                  | 10            | <b>20</b>     |
| <b>200</b>   | 37             | 37                         | 23            | <b>39</b>     |
| <b>300</b>   | 52             | 52                         | 30            | <b>54</b>     |
| <b>400</b>   | 61             | 60                         | 41            | <b>72</b>     |
| <b>500</b>   | 71             | 71                         | 50            | <b>83</b>     |
| <b>600</b>   | 82             | 81                         | 56            | <b>95</b>     |
| <b>700</b>   | 90             | 89                         | 63            | <b>104</b>    |
| <b>800</b>   | 98             | 95                         | 70            | <b>110</b>    |
| <b>900</b>   | 102            | 101                        | 76            | <b>116</b>    |
| <b>1,000</b> | 106            | 106                        | 84            | <b>127</b>    |
